# Supplementary material
Source: PubMed Central journal article supplement (PMC4658208)

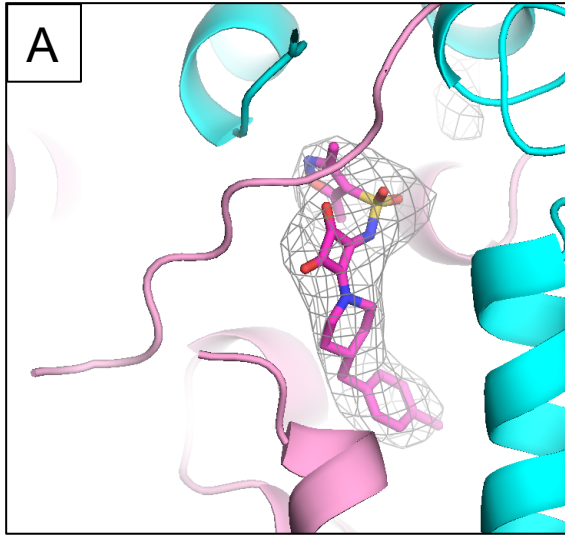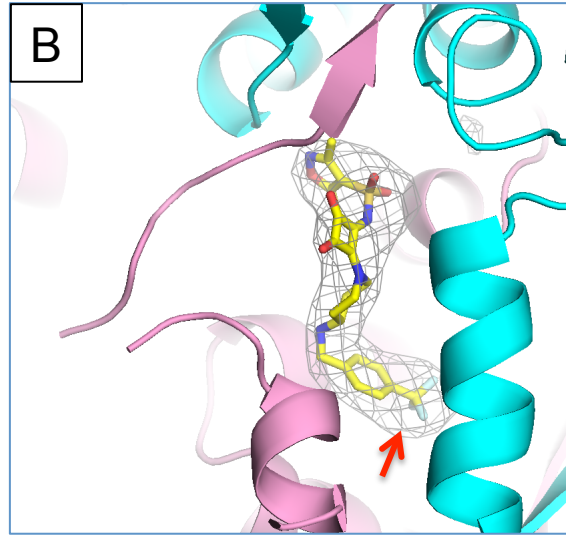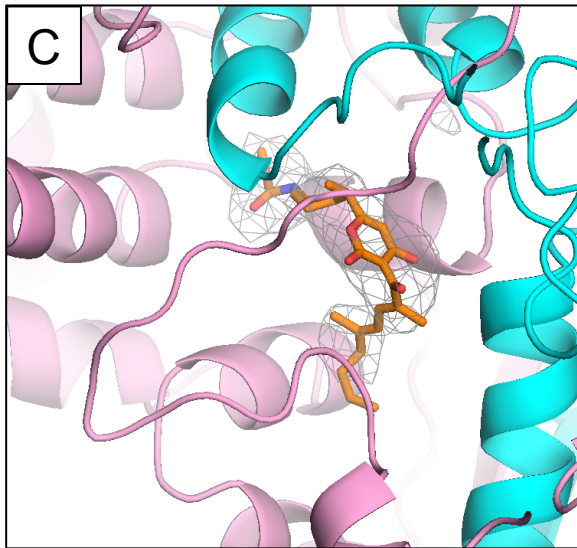

Molodtsov *et al.*, Supplemental Fig. 1

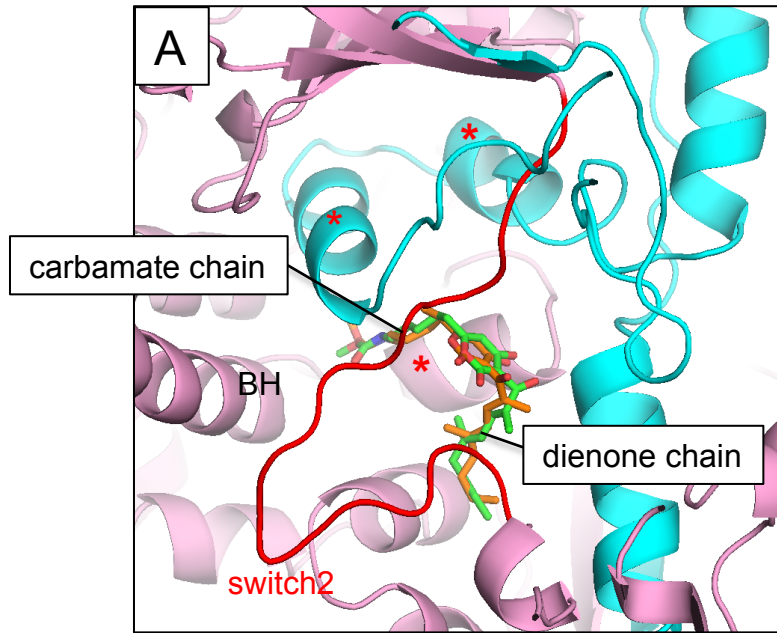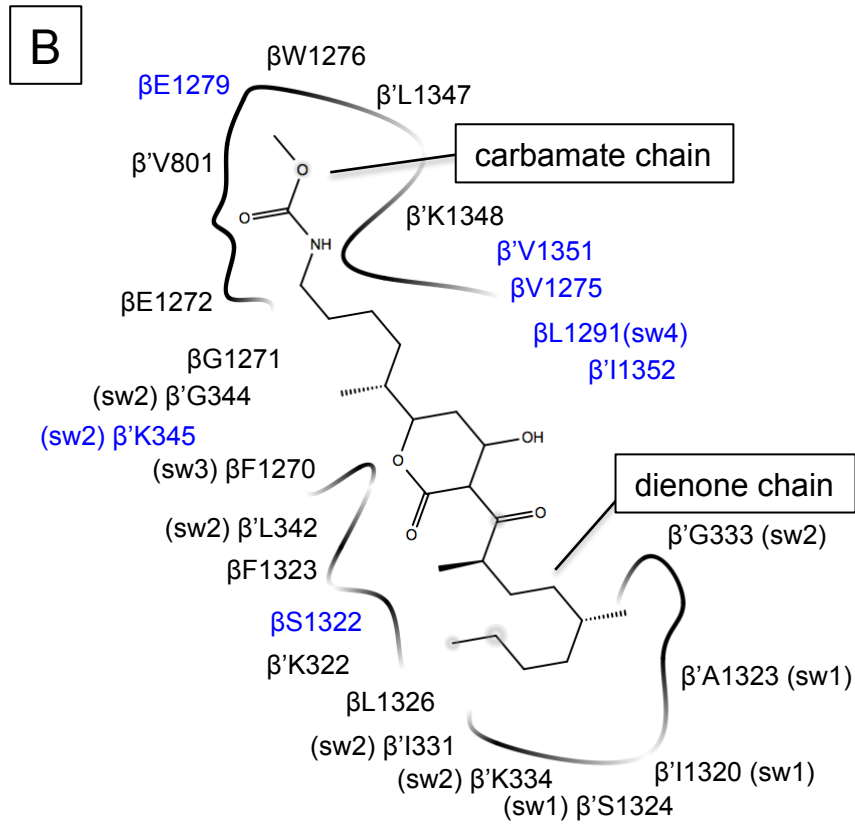

Supplement: NIHMS738403-supplement-SFig1-2.pdf [file NIHMS738403-supplement-SFig1-2.pdf]
